# Supplementary material
Source: PubMed Central journal article supplement (PMC4079150)
Supplement: CJP-2014-vol59-June-319-325-eTable-3.pdf [file CJP-2014-vol59-June-319-325-eTable-3.pdf]

Zamorski MA, Rusu C, Garber BG. Prevalence and correlates of mental health problems in Canadian Forces personnel who deployed in support of the mission in Afghanistan: findings from postdeployment screenings, 2009–2012. *Can J Psychiatry*. 2014;59(6):319–326.

Table 3: Risk Factors for Any of Six Post-deployment Mental Health Problems (Overall N = 16193)

| Variable                                   |                  | Any of six mental health problems present |       |       |       |       | Unadjusted OR (95% CI) <sup>d</sup> | p value for unadjusted OR | Adjusted OR (95% CI) <sup>e</sup> | P value for adjusted OR |
|--------------------------------------------|------------------|-------------------------------------------|-------|-------|-------|-------|-------------------------------------|---------------------------|-----------------------------------|-------------------------|
|                                            |                  | No                                        |       | Yes   |       | Total |                                     |                           |                                   |                         |
|                                            |                  | Count                                     | %     | Count | %     | Count |                                     |                           |                                   |                         |
| Factors acting across the deployment cycle |                  |                                           |       |       |       |       |                                     |                           |                                   |                         |
| Sex                                        | Male             | 12822                                     | 90.2% | 1400  | 9.8%  | 14222 | -- <sup>f</sup>                     | --                        | --                                | --                      |
|                                            | Female           | 1244                                      | 86.1% | 201   | 13.9% | 1445  | <b>1.48 (1.26 – 1.73)</b>           | <0.001                    | <b>1.25 (1.03 – 1.51)</b>         | 0.024                   |
|                                            | Total            | 14066                                     | 89.8% | 1601  | 10.2% | 15667 |                                     |                           |                                   |                         |
| Age at time of questionnaire               | 24 years or less | 2799                                      | 91.2% | 270   | 8.8%  | 3069  | <b>0.85 (0.74 – 0.99)</b>           | 0.034                     | 0.89 (0.75 – 1.035)               | 0.174                   |
|                                            | 25 to 35 years   | 6177                                      | 89.8% | 700   | 10.2% | 6877  | --                                  | --                        | --                                | --                      |
|                                            | 35 to 44 years   | 3471                                      | 88.7% | 440   | 11.3% | 3911  | 1.12 (0.99 – 1.27)                  | 0.077                     | <b>1.20 (1.02 – 1.40)</b>         | 0.027                   |
|                                            | 45 years or more | 1611                                      | 89.3% | 192   | 10.7% | 1803  | 1.05 (0.89 – 1.25)                  | 0.544                     | <b>1.53 (1.23 – 1.90)</b>         | 0.001                   |
|                                            | Total            | 14058                                     | 89.8% | 1602  | 10.2% | 15660 |                                     |                           |                                   |                         |
| Language                                   | English          | 10169                                     | 88.6% | 1304  | 11.4% | 11473 | --                                  | --                        | --                                | --                      |
|                                            | French           | 3776                                      | 92.9% | 288   | 7.1%  | 4064  | <b>0.60 (0.52 – 0.68)</b>           | <0.001                    | <b>0.63 (0.54 – 0.74)</b>         | <0.001                  |
|                                            | Other            | 74                                        | 94.9% | 4     | 5.1%  | 78    | 0.42 (0.15 – 1.15)                  | 0.093                     | 0.57 (0.20 – 1.65)                | 0.302                   |
|                                            | Total            | 14019                                     | 89.8% | 1596  | 10.2% | 15615 |                                     |                           |                                   |                         |

Zamorski MA, Rusu C, Garber BG. Prevalence and correlates of mental health problems in Canadian Forces personnel who deployed in support of the mission in Afghanistan: findings from postdeployment screenings, 2009–2012. *Can J Psychiatry*. 2014;59(6):319–326.

|                   |                                 |       |       |      |       |       |                           |        |                           |        |
|-------------------|---------------------------------|-------|-------|------|-------|-------|---------------------------|--------|---------------------------|--------|
| Marital status    | Married or living with partner  | 7786  | 89.8% | 881  | 10.2% | 8667  | --                        | --     | --                        | --     |
|                   | Single (never married)          | 5280  | 90.9% | 526  | 9.1%  | 5806  | <b>0.88 (0.79 – 0.99)</b> | 0.027  | 1.00 (0.87 – 1.16)        | 0.955  |
|                   | Widowed, divorced, or separated | 1000  | 83.7% | 194  | 16.3% | 1194  | <b>1.71 (1.45 – 2.03)</b> | <0.001 | <b>1.25 (1.03 – 1.52)</b> | 0.022  |
|                   | Total                           | 14066 | 89.8% | 1601 | 10.0% | 15667 |                           |        |                           |        |
| Component         | Regular Force                   | 11985 | 89.5% | 1401 | 10.5% | 13386 | --                        | --     | --                        | --     |
|                   | Reserve Force                   | 2083  | 91.2% | 201  | 8.8%  | 2284  | <b>0.83 (0.71 – 0.96)</b> | 0.015  | 0.94 (0.79 – 1.12)        | 0.491  |
|                   | Total                           | 14068 | 89.8% | 1602 | 10.2% | 15670 |                           |        |                           |        |
| Element           | Army                            | 11139 | 89.4% | 1325 | 10.6% | 12464 | --                        | --     | --                        | --     |
|                   | Navy                            | 829   | 90.3% | 89   | 9.7%  | 918   | 0.90 (0.72 – 1.13)        | 0.378  | 1.04 (0.80 – 1.35)        | 0.791  |
|                   | Air Force                       | 2074  | 91.8% | 186  | 8.2%  | 2260  | <b>0.75 (0.64 – 0.89)</b> | 0.0006 | <b>0.82 (0.67 – 0.99)</b> | 0.036  |
|                   | Total                           | 14042 | 89.8% | 1600 | 10.2% | 15642 |                           |        |                           |        |
| Rank              | Officer                         | 2116  | 94.0% | 136  | 6.0%  | 2252  | <b>0.53 (0.44 – 0.63)</b> | <0.001 | <b>0.54 (0.44 – 0.67)</b> | <0.001 |
|                   | Senior non-commissioned member  | 2453  | 88.8% | 309  | 11.2% | 2762  | 1.03 (0.91 – 1.18)        | 0.613  | 0.85 (0.72 – 1.01)        | 0.069  |
|                   | Junior non-commissioned member  | 9484  | 89.1% | 1156 | 10.9% | 10640 | --                        | --     | --                        | --     |
|                   | Total                           | 14053 | 89.8% | 1601 | 10.2% | 15654 |                           |        |                           |        |
| Years of military | 5 years or less                 | 4614  | 90.3% | 497  | 9.7%  | 5111  | --                        | --     |                           |        |

Zamorski MA, Rusu C, Garber BG. Prevalence and correlates of mental health problems in Canadian Forces personnel who deployed in support of the mission in Afghanistan: findings from postdeployment screenings, 2009–2012. *Can J Psychiatry*. 2014;59(6):319–326.

|                                |                    |       |       |      |       |       |                              |        |                              |        |
|--------------------------------|--------------------|-------|-------|------|-------|-------|------------------------------|--------|------------------------------|--------|
| service                        | 6 to 15 years      | 5443  | 89.8% | 620  | 10.2% | 6063  | 1.06 (0.93 – 1.20)           | 0.375  |                              |        |
|                                | 16 years or more   | 4011  | 89.2% | 485  | 10.8% | 4496  | 1.12 (0.98 – 1.28)           | 0.085  |                              |        |
|                                | Total              | 14068 | 89.8% | 1602 | 10.2% | 15670 |                              |        |                              |        |
| Pre-deployment factors         |                    |       |       |      |       |       |                              |        |                              |        |
| Number of previous deployments | None               | 6577  | 89.8% | 747  | 10.2% | 7324  | --                           | --     |                              |        |
|                                | One or two         | 4380  | 90.3% | 468  | 9.7%  | 4848  | 0.94 (0.83 – 1.06)           | 0.298  |                              |        |
|                                | Three or more      | 2985  | 89.0% | 370  | 11.0% | 3355  | 1.09 (0.95 – 1.24)           | 0.209  |                              |        |
|                                | Total              | 13942 | 90.2% | 1585 | 9.8%  | 15527 |                              |        |                              |        |
| Mental health care history     | Never              | 11528 | 94.1% | 722  | 5.9%  | 12250 | --                           | --     | --                           | --     |
|                                | Past care only     | 1711  | 84.4% | 315  | 15.6% | 2026  | <b>2.90 (2.51 – 3.33)</b>    | <0.001 | <b>2.89 (2.49 – 3.35)</b>    | <0.001 |
|                                | Current care       | 644   | 54.3% | 542  | 45.7% | 1186  | <b>13.23 (11.55 – 15.16)</b> | <0.001 | <b>12.52 (10.82 – 14.49)</b> | <0.001 |
|                                | Total              | 13883 | 89.8% | 1579 | 10.2% | 15462 |                              |        |                              |        |
| Intra-deployment factors       |                    |       |       |      |       |       |                              |        |                              |        |
| Deployment length              | Less than 2 months | 290   | 90.9% | 29   | 9.1%  | 319   | 0.88 (0.60 – 1.30)           | 0.532  |                              |        |
|                                | 2 to 5 months      | 1709  | 89.6% | 198  | 10.4% | 1907  | 1.02 (0.87 – 1.20)           | 0.767  |                              |        |
|                                | 6 to 8 months      | 10995 | 89.8% | 1242 | 10.2% | 12237 | --                           | --     |                              |        |
|                                | 9 months or more   | 1065  | 89.1% | 130  | 10.9% | 1195  | 1.08 (0.89 – 1.31)           | 0.436  |                              |        |
|                                | Total              | 14059 | 89.8% | 1599 | 10.2% | 15658 |                              |        |                              |        |
| Combat exposure                | First              | 4121  | 93.6% | 280  | 6.4%  | 4401  | --                           | --     | --                           | --     |

Zamorski MA, Rusu C, Garber BG. Prevalence and correlates of mental health problems in Canadian Forces personnel who deployed in support of the mission in Afghanistan: findings from postdeployment screenings, 2009–2012. *Can J Psychiatry*. 2014;59(6):319–326.

|                                                                      |                          |       |       |      |       |       |                           |        |                           |        |
|----------------------------------------------------------------------|--------------------------|-------|-------|------|-------|-------|---------------------------|--------|---------------------------|--------|
| tertile                                                              | Second                   | 5612  | 90.4% | 597  | 9.6%  | 6209  | <b>1.47 (1.28 – 1.70)</b> | <0.001 | <b>1.59 (1.35 – 1.87)</b> | <0.001 |
|                                                                      | Third                    | 4192  | 85.7% | 697  | 14.3% | 4886  | <b>2.30 (2.00 – 2.65)</b> | <0.001 | <b>2.57 (2.16 – 3.06)</b> | <0.001 |
|                                                                      | Total                    | 13925 | 89.8% | 1574 | 10.2% | 15499 |                           |        |                           |        |
| Post-deployment factor                                               |                          |       |       |      |       |       |                           |        |                           |        |
| Lag time between return from deployment and questionnaire completion | Less than 90 days        | 1916  | 92.6% | 152  | 7.4%  | 2068  | <b>0.65 (0.54 – 0.77)</b> | <0.001 | <b>0.75 (0.62 – 0.92)</b> | 0.005  |
|                                                                      | Between 90 and 180 days  | 8116  | 89.1% | 997  | 10.9% | 9113  | --                        | --     | --                        | --     |
|                                                                      | Between 181 and 365 days | 3121  | 89.9% | 351  | 10.1% | 3472  | 0.92 (0.81 – 1.04)        | 0.180  | 0.88 (0.77 – 1.02)        | 0.095  |
|                                                                      | 366 days or more         | 716   | 90.2% | 78   | 9.8%  | 794   | 0.89 (0.70 – 1.13)        | 0.335  | 0.87 (0.67 – 1.15)        | 0.329  |
|                                                                      | Total                    | 13869 | 89.8% | 1578 | 10.2% | 15447 |                           |        |                           |        |

a. Sergeant or equivalent and above

b. Master Corporal and equivalent or below

c. Tertiles were determined with respect to a larger reference population, accounting for the unequal distribution.

d. OR = odds ratio; CI = confidence interval; **bold** indicates statistically significant findings ( $p < 0.05$ )

e. OR = odds ratio; CI = confidence interval; OR is adjusted for sex, age, language, marital status, component, element, rank, combat exposure, lag time between return from deployment and questionnaire completion, and mental health care history; **bold** indicates statistically significant findings ( $p < 0.05$ )

f. -- indicates reference category
